# Supplementary material
Source: PubMed Central journal article supplement (PMC3793012)
Supplement: NIHMS520303-supplement-10858_2013_9773_MOESM1_ESM.pdf [file NIHMS520303-supplement-10858_2013_9773_MOESM1_ESM.pdf]

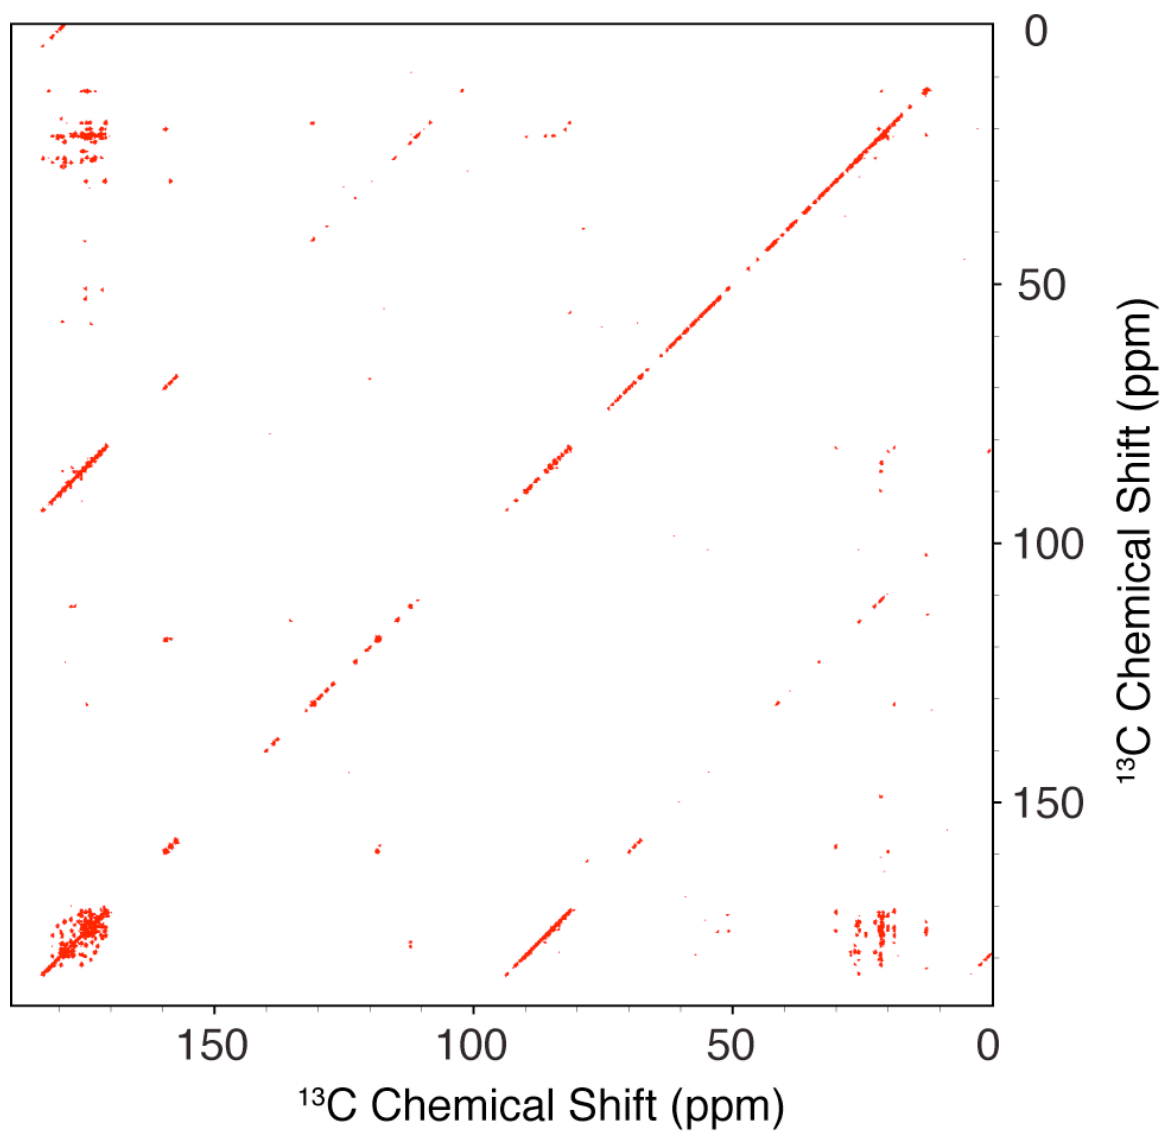

Figure S1: The full  $^{13}\text{C}$ - $^{13}\text{C}$  RFDR spectrum of redox-labeled GB1 corresponding to the left side of Figure 6 in the main text.. The spectrum was acquired with 12.4 ms RFDR mixing and 18 kHz MAS.

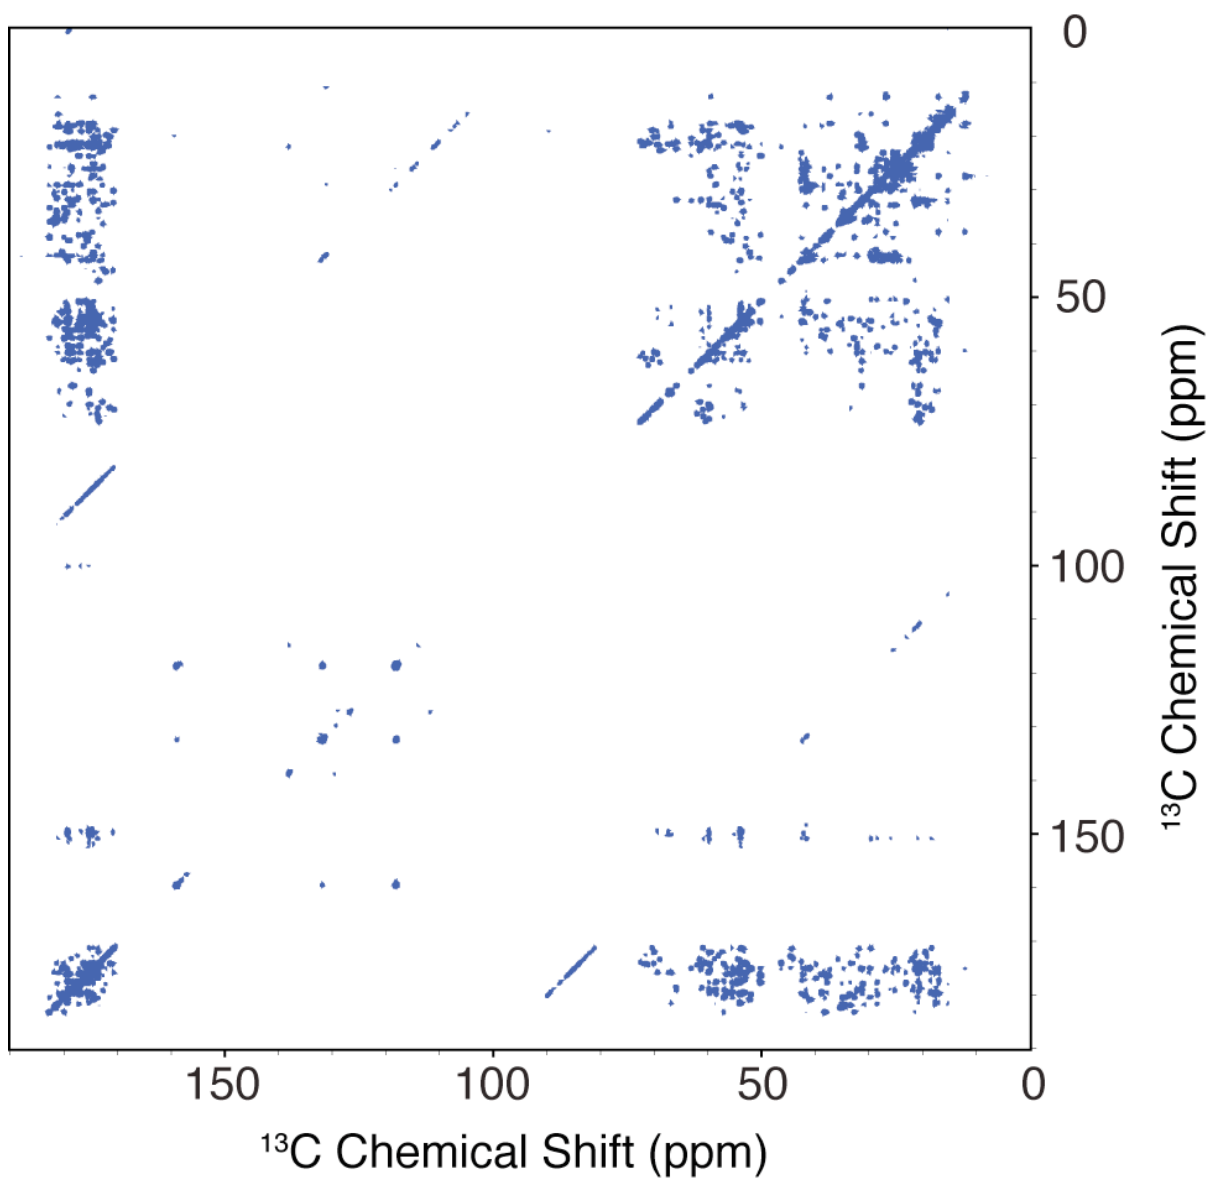

Figure S2: The full  $^{13}\text{C}$ - $^{13}\text{C}$  RFDR spectrum of uniformly labeled GB1 corresponding to the right side of Figure 6 in the main text. The spectrum was acquired with 12.4 ms RFDR mixing and 18 kHz MAS.

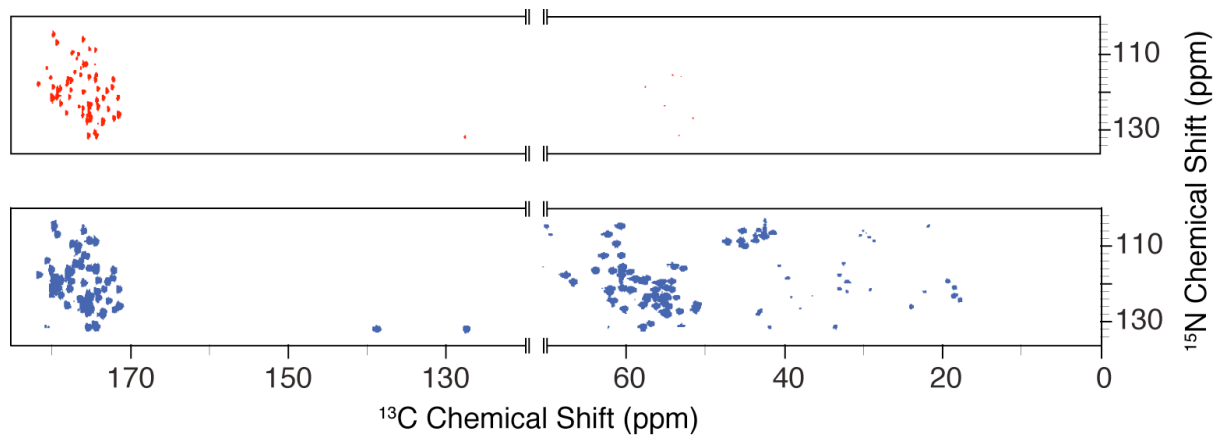

Figure S3: The full  $^{15}\text{N}$ - $^{13}\text{C}$  TEDOR spectra corresponding to Figure 5 in the main text: uniformly labeled GB1 (bottom) and redox labeled GB1 (top).
